# Supplementary material for: A serine protease KLK8 emerges as a regulator of regulators in memory: Microtubule protein dependent neuronal morphology and PKA-CREB signaling
Source: PubMed Central journal article supplement (PMC6028475; doi:10.1038/s41598-018-27640-6), 2018-07-02

**A serine protease KLK8 emerges as regulator of regulators in memory: Microtubule protein dependent neuronal morphology and PKA-CREB signaling**

**Arpita Konar, Ashish Kumar, Bryan Maloney, Debomoy K. Lahiri, and Mahendra K. Thakur**

**Supplementary Material**

S1. DAPI staining assessment of nuclear morphology and light microscopy of cultures.

S2-S4. Full-length images of blots presented in main paper.

S1

**Control**

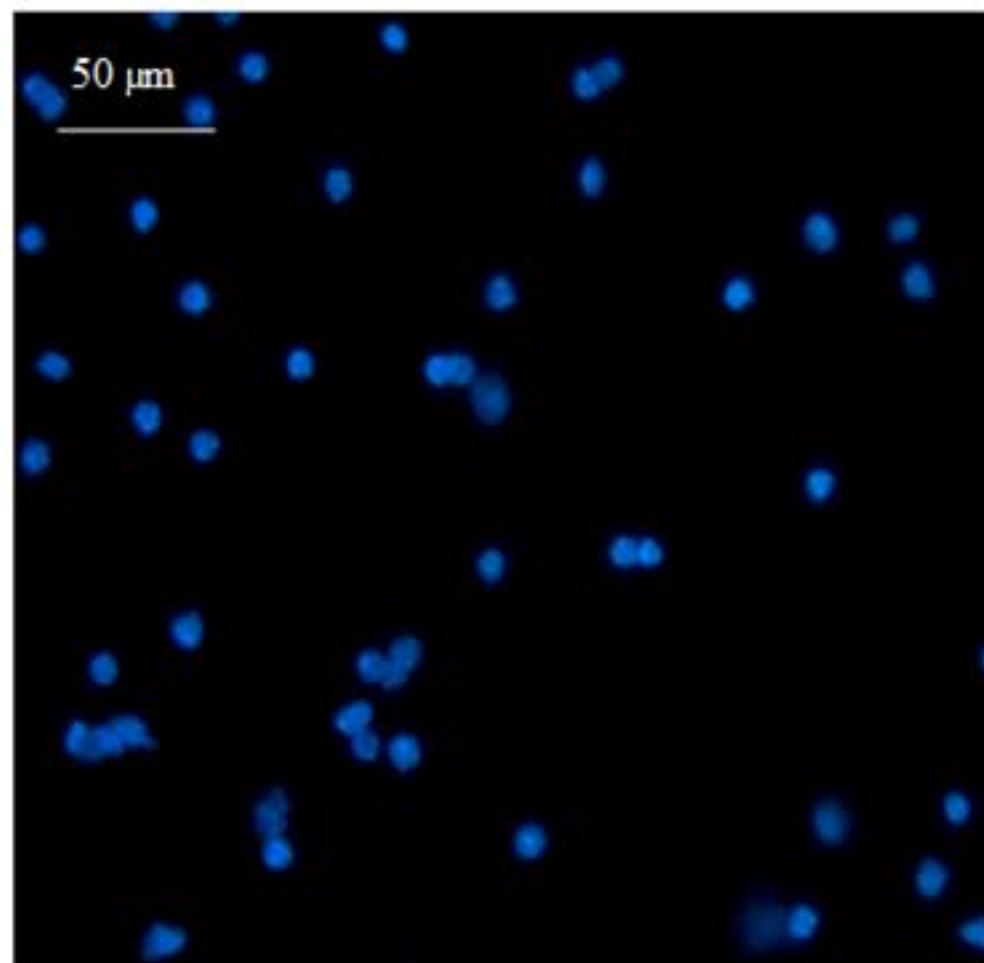

**Scrambled siRNA**

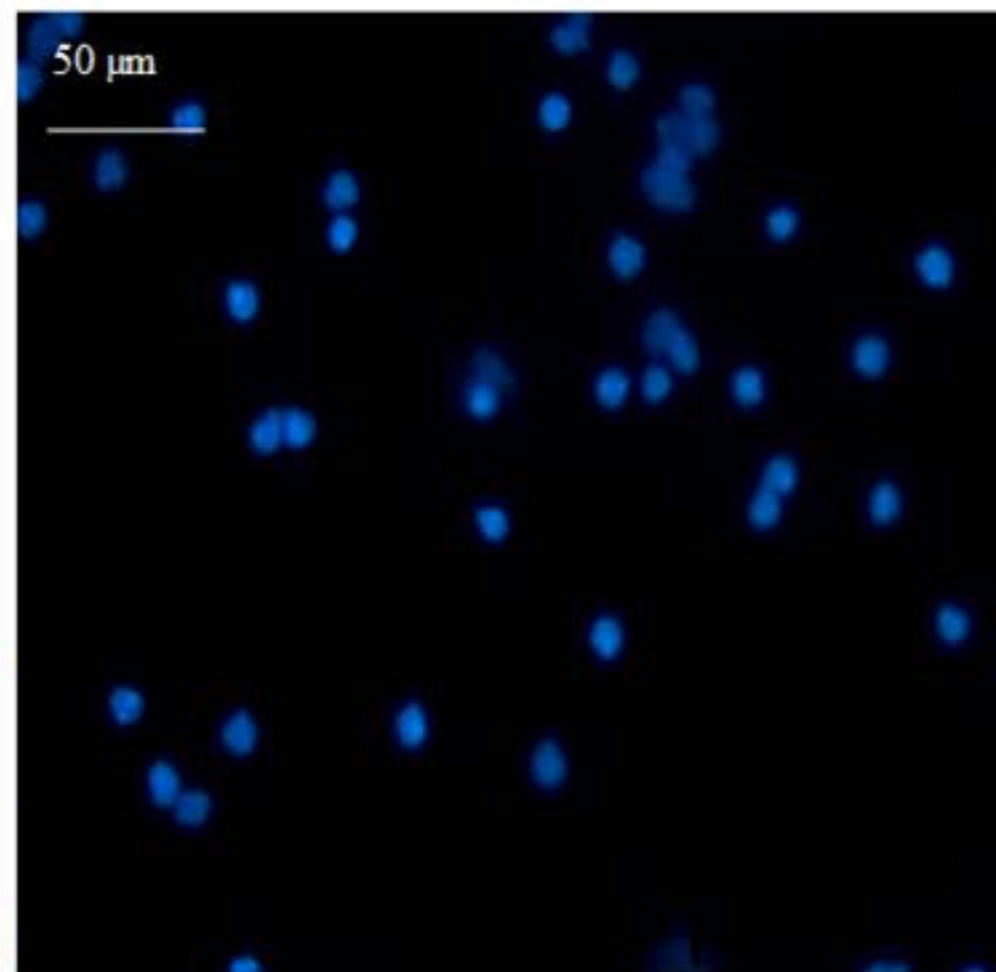

**KLK8 siRNA**

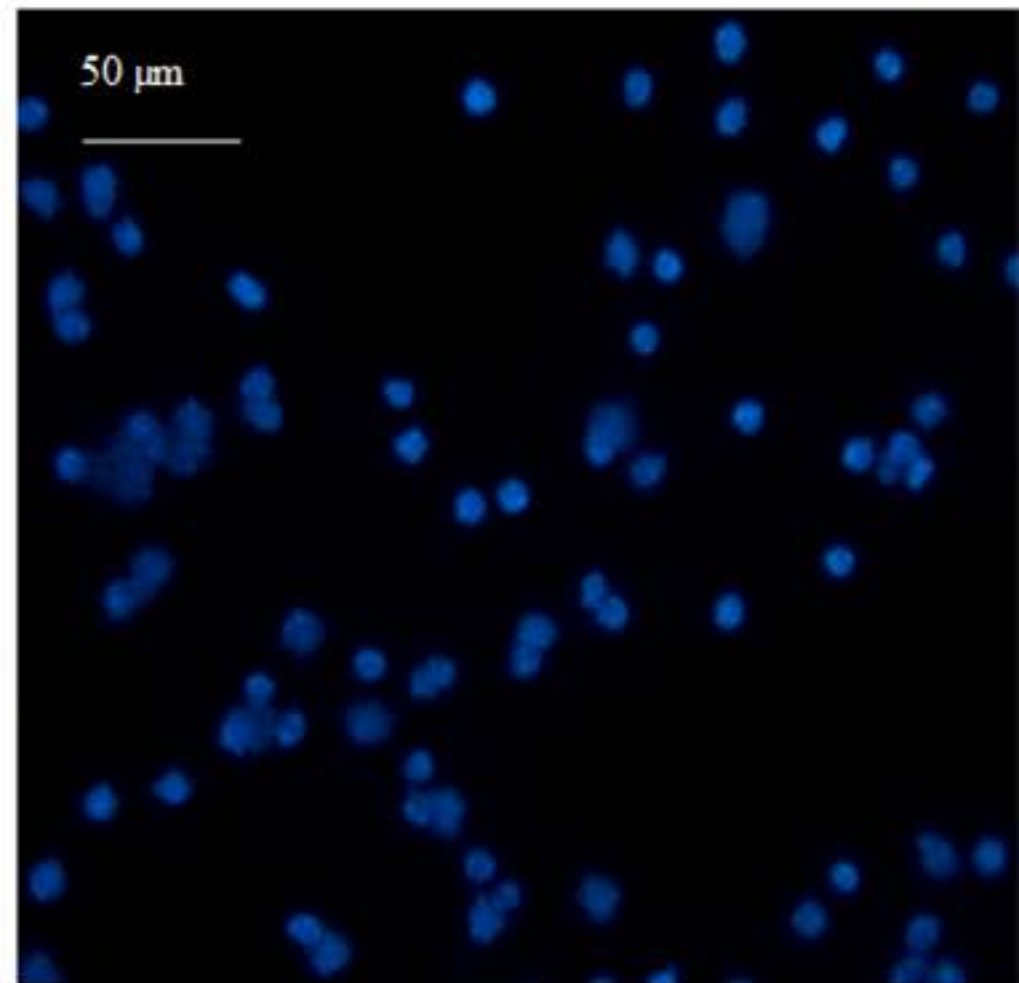

S2

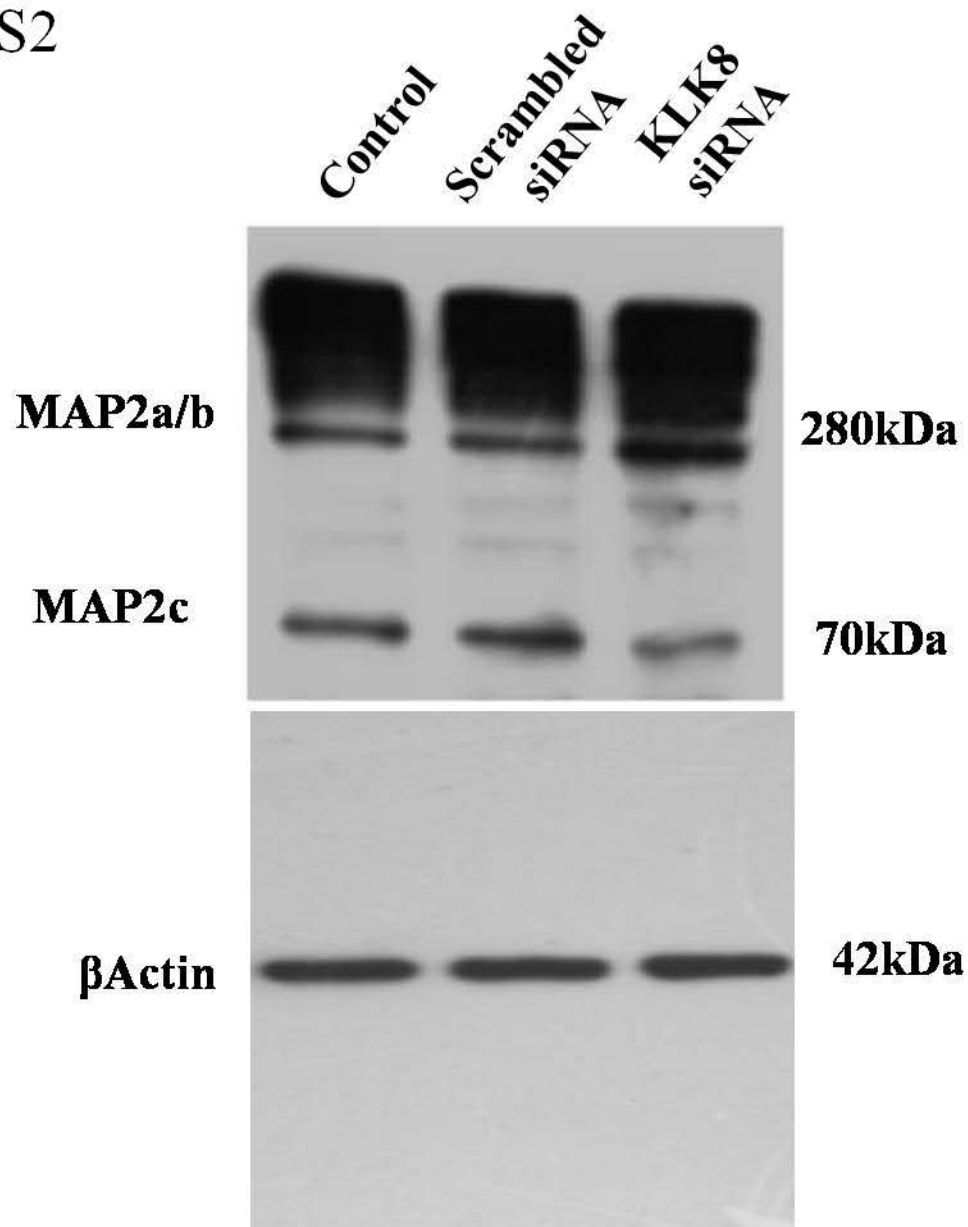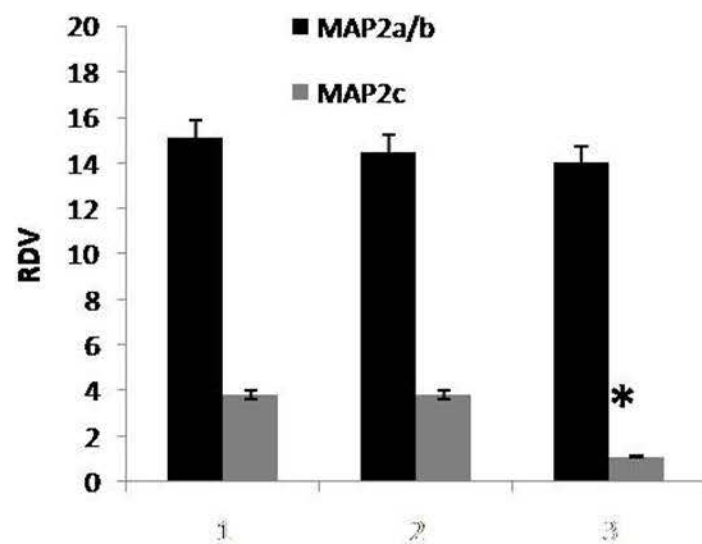

S3

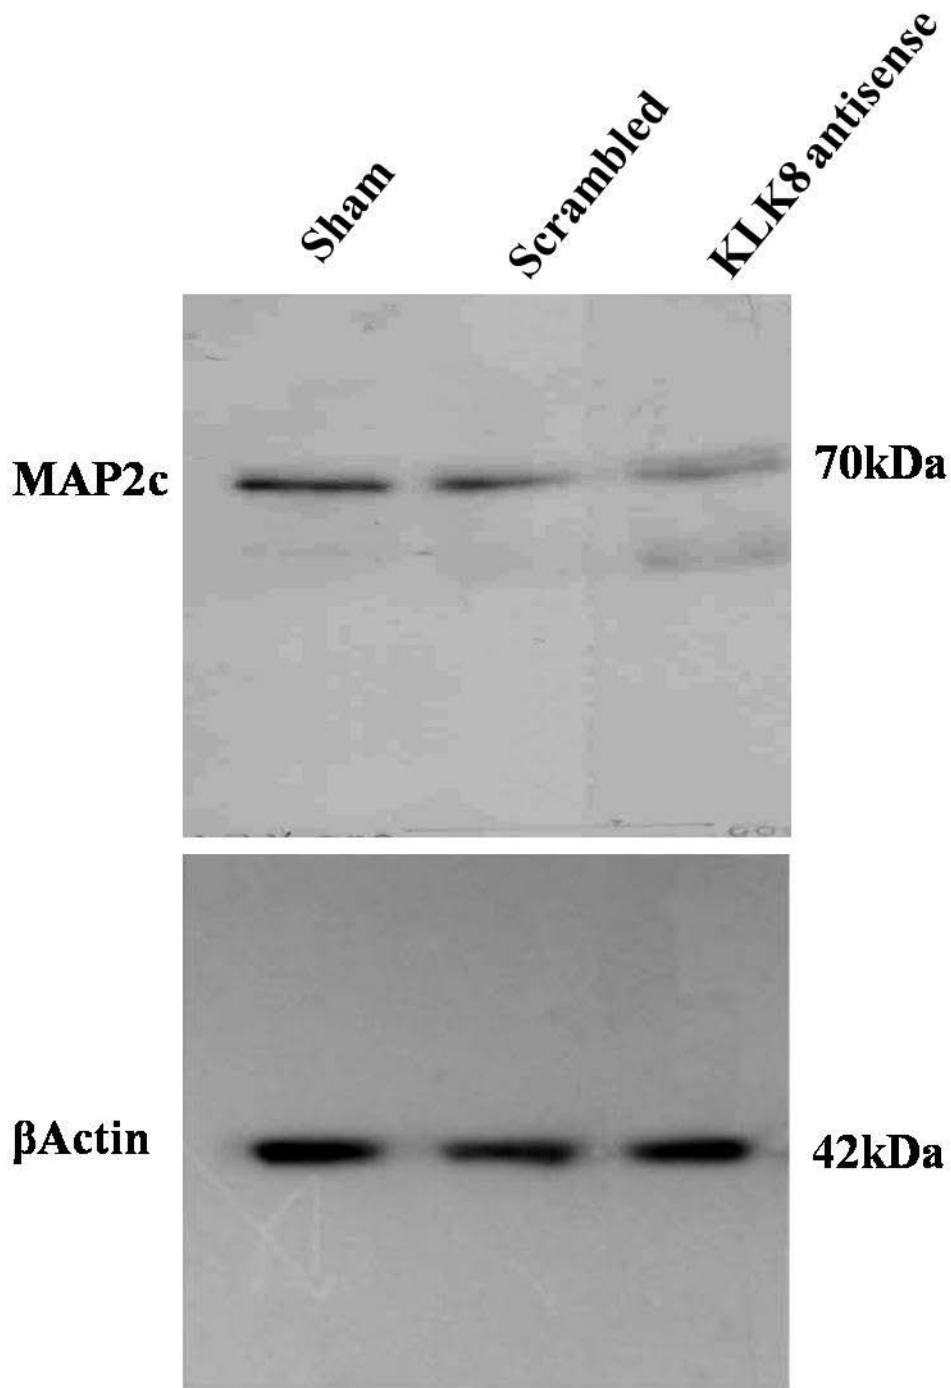

S4

*Sham*

*Scrambled*

*KLK8 antisense*

**PKA**

**40kDa**

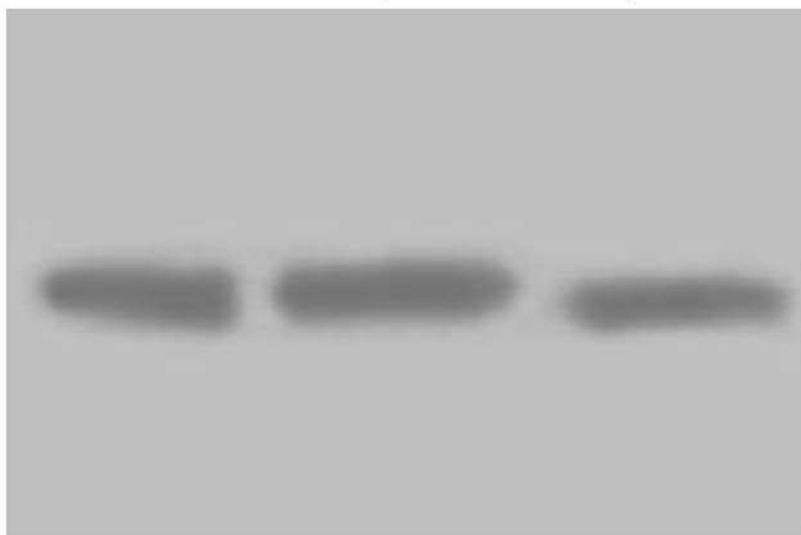

**pCREB**

**43kDa**

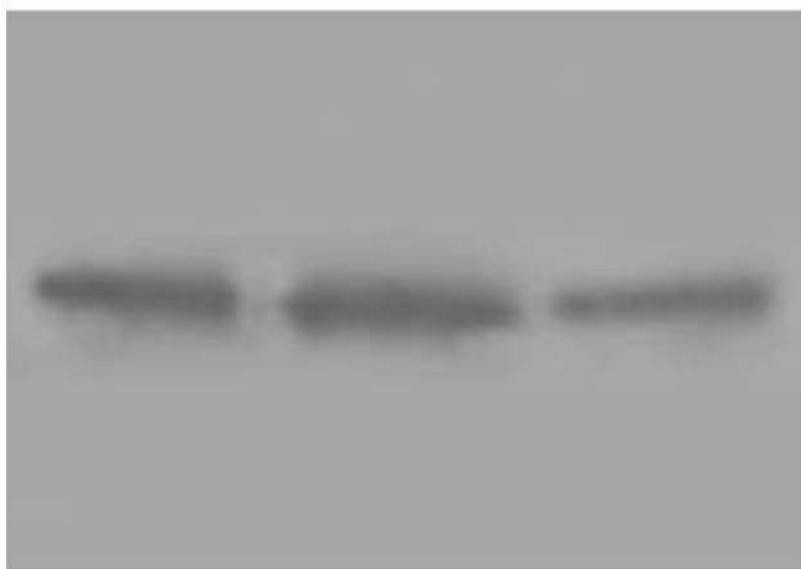

**$\beta$  actin**

**42kDa**

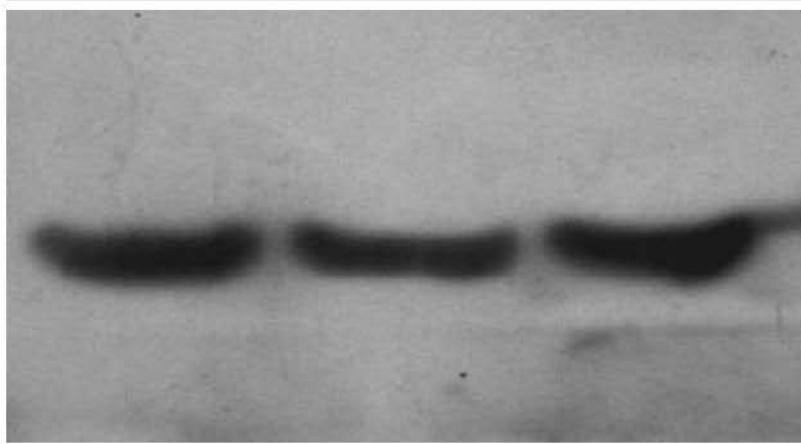

Supplement: 41598_2018_27640_MOESM1_ESM.pdf [file 41598_2018_27640_MOESM1_ESM.pdf]
